# Supplementary material for: An advanced kinetic approach to the multistep thermal dehydration of calcium sulfate dihydrate under different heating and water vapor conditions: kinetic deconvolution and universal isoconversional analyses
Source: Royal Society of Chemistry journal article supplement (doi:10.1039/d2cp00640e), 2022-01-01
Supplement: d2cp00640e1.pdf [file d2cp00640e1.pdf]

# Advanced kinetic approach to the multistep thermal dehydration of calcium sulfate dihydrate under different heating and water vapor conditions: kinetic deconvolution and universal isoconversional analyses

Shun Iwasaki, Yuto Zushi, and Nobuyoshi Koga\*

Department of Science Education, Division of Educational Sciences, Graduate School of Humanities and Social Sciences, Hiroshima University, 1-1-1 Kagamiyama, Higashi-Hiroshima 739-8524, Japan

## Contents

|                                                                                                                                                                                                                                                                                                                                                                                                                                                                                                                                                                                                                                                                                                                                                                                                                                                                        |    |
|------------------------------------------------------------------------------------------------------------------------------------------------------------------------------------------------------------------------------------------------------------------------------------------------------------------------------------------------------------------------------------------------------------------------------------------------------------------------------------------------------------------------------------------------------------------------------------------------------------------------------------------------------------------------------------------------------------------------------------------------------------------------------------------------------------------------------------------------------------------------|----|
| S1. Kinetics of the thermal dehydration of CS-DH at different atmospheric $p(\text{H}_2\text{O})$ values.....                                                                                                                                                                                                                                                                                                                                                                                                                                                                                                                                                                                                                                                                                                                                                          | s3 |
| S1.1 Mass-loss traces under isothermal conditions .....                                                                                                                                                                                                                                                                                                                                                                                                                                                                                                                                                                                                                                                                                                                                                                                                                | s3 |
| <b>Figure S1.</b> TG–DTG curves recorded under isothermal conditions at different temperatures in a flow of $\text{N}_2\text{–H}_2\text{O}$ mixed gas ( $q_v = 400 \text{ cm}^3 \text{ min}^{-1}$ ) characterized by different $p(\text{H}_2\text{O})$ values: (a) $p(\text{H}_2\text{O}) = 0.18 \text{ kPa}$ ( $m_0 = 5.071 \pm 0.170 \text{ mg}$ ), (b) $p(\text{H}_2\text{O}) = 1.07 \text{ kPa}$ ( $m_0 = 5.003 \pm 0.026 \text{ mg}$ ), (c) $p(\text{H}_2\text{O}) = 3.19 \text{ kPa}$ ( $m_0 = 5.032 \pm 0.148 \text{ mg}$ ), (d) $p(\text{H}_2\text{O}) = 5.18 \text{ kPa}$ ( $m_0 = 5.043 \pm 0.147 \text{ mg}$ ), (e) $p(\text{H}_2\text{O}) = 7.72 \text{ kPa}$ ( $m_0 = 4.991 \pm 0.093 \text{ mg}$ ), and (f) $p(\text{H}_2\text{O}) = 11.13 \text{ kPa}$ ( $m_0 = 4.988 \pm 0.100 \text{ mg}$ ).....                                                      | s3 |
| S1.2 Induction period .....                                                                                                                                                                                                                                                                                                                                                                                                                                                                                                                                                                                                                                                                                                                                                                                                                                            | s3 |
| <b>Table S1.</b> Arrhenius parameters for the IP processes of the thermal dehydration of CS-DH at each $p(\text{H}_2\text{O})$ value, determined by the conventional Arrhenius-type plots without considering the effect of $p(\text{H}_2\text{O})$ .....                                                                                                                                                                                                                                                                                                                                                                                                                                                                                                                                                                                                              | s3 |
| <b>Figure S2.</b> Temperature dependences of $P_{\text{eq}}(T)$ for the thermal dehydrations of CS-DH to anhydride, CS-DH to CS-HH, and CS-HH to anhydride, calculated based on a thermodynamic database (MALT-2, Kagaku-Gijutusha), together with the experimentally applied ( $T, p(\text{H}_2\text{O})$ ) values.....                                                                                                                                                                                                                                                                                                                                                                                                                                                                                                                                               | s4 |
| S1.3 Mass-loss traces under linear nonisothermal conditions .....                                                                                                                                                                                                                                                                                                                                                                                                                                                                                                                                                                                                                                                                                                                                                                                                      | s4 |
| <b>Figure S3.</b> TG–DTG curves for the thermal dehydration of CS-DH recorded under linear nonisothermal conditions at different $\beta$ values in a flow of the $\text{N}_2\text{–H}_2\text{O}$ mixed gas ( $q_v = 400 \text{ cm}^3 \text{ min}^{-1}$ ) characterized by different $p(\text{H}_2\text{O})$ values: (a) $p(\text{H}_2\text{O}) = 0.18 \text{ kPa}$ ( $m_0 = 5.104 \pm 0.242 \text{ mg}$ ), (b) $p(\text{H}_2\text{O}) = 1.07 \text{ kPa}$ ( $m_0 = 5.004 \pm 0.032 \text{ mg}$ ), (c) $p(\text{H}_2\text{O}) = 3.19 \text{ kPa}$ ( $m_0 = 5.045 \pm 0.162 \text{ mg}$ ), (d) $p(\text{H}_2\text{O}) = 5.18 \text{ kPa}$ ( $m_0 = 4.807 \pm 0.135 \text{ mg}$ ), (e) $p(\text{H}_2\text{O}) = 7.72 \text{ kPa}$ ( $m_0 = 5.007 \pm 0.024 \text{ mg}$ ), and (f) $p(\text{H}_2\text{O}) = 11.13 \text{ kPa}$ ( $m_0 = 4.953 \pm 0.074 \text{ mg}$ )..... | s4 |
| S1.4 Mathematical deconvolution analysis.....                                                                                                                                                                                                                                                                                                                                                                                                                                                                                                                                                                                                                                                                                                                                                                                                                          | s5 |
| <b>Figure S4.</b> Typical MDA results for the two-step mass-loss process of the thermal dehydration of CS-DH to anhydride via CS-HH at different $p(\text{H}_2\text{O})$ values: (a) 3.19, (b) 5.18, (c) 7.72, and (d) 11.13 kPa.....                                                                                                                                                                                                                                                                                                                                                                                                                                                                                                                                                                                                                                  | s5 |
| <b>Table S2.</b> The results of MDA and subsequent isoconversional kinetic analysis of the mathematically separated kinetic curves for the thermal dehydrations of CS-DH to CS-HH and CS-HH to anhydride at different $p(\text{H}_2\text{O})$ values.....                                                                                                                                                                                                                                                                                                                                                                                                                                                                                                                                                                                                              | s6 |
| <b>Figure S5.</b> Series of kinetic curves at different $\beta$ values for each reaction step of the thermal dehydration of CS-DH to anhydride via CS-HH intermediate at $p(\text{H}_2\text{O}) = 3.19 \text{ kPa}$ : (a) $i = 1$ and (b) $i = 2$ .....                                                                                                                                                                                                                                                                                                                                                                                                                                                                                                                                                                                                                | s7 |
| <b>Figure S6.</b> Series of kinetic curves at different $\beta$ values for each reaction step of the thermal dehydration of CS-DH to anhydride via CS-HH intermediate at $p(\text{H}_2\text{O}) = 5.18 \text{ kPa}$ : (a) $i = 1$ and (b) $i = 2$ .....                                                                                                                                                                                                                                                                                                                                                                                                                                                                                                                                                                                                                | s7 |
| <b>Figure S7.</b> Series of kinetic curves at different $\beta$ values for each reaction step of the thermal dehydration of CS-DH to anhydride via CS-HH intermediate at $p(\text{H}_2\text{O}) = 7.72 \text{ kPa}$ : (a) $i = 1$ and (b) $i = 2$ .....                                                                                                                                                                                                                                                                                                                                                                                                                                                                                                                                                                                                                | s7 |
| <b>Figure S8.</b> Series of kinetic curves at different $\beta$ values for each reaction step of the thermal dehydration of CS-DH to anhydride via CS-HH intermediate at $p(\text{H}_2\text{O}) = 11.13 \text{ kPa}$ : (a) $i = 1$ and (b) $i = 2$ .....                                                                                                                                                                                                                                                                                                                                                                                                                                                                                                                                                                                                               | s7 |
| <b>Figure S9.</b> The Friedman plots at different $\alpha_1$ values for the thermal dehydration of CS-DH to CS-HH intermediate at different $p(\text{H}_2\text{O})$ values: (a) 3.19, (b) 5.18, (c) 7.72, and (d) 11.13 kPa.....                                                                                                                                                                                                                                                                                                                                                                                                                                                                                                                                                                                                                                       | s8 |
| <b>Figure S10.</b> The Friedman plots at different $\alpha_2$ values for the thermal dehydration of CS-HH intermediate to anhydride at different $p(\text{H}_2\text{O})$ values: (a) 3.19, (b) 5.18, (c) 7.72, and (d) 11.13 kPa.....                                                                                                                                                                                                                                                                                                                                                                                                                                                                                                                                                                                                                                  | s8 |
| <b>Figure S11.</b> $E_{a,i}$ values at different $\alpha_i$ values for the individual reaction steps of the thermal dehydration of CS-DH at the respective $p(\text{H}_2\text{O})$ values: (a) $i = 1$ and (b) $i = 2$ .....                                                                                                                                                                                                                                                                                                                                                                                                                                                                                                                                                                                                                                           | s9 |
| <b>Figure S12.</b> Experimental master plots of $(d\alpha_i/d\theta_i)$ versus $\alpha_i$ normalized by $(d\alpha_i/d\theta_i)$ at $\alpha_i = 0.5$ at different $p(\text{H}_2\text{O})$ values for the individual reaction steps of the thermal dehydration of CS-DH: (a) $i = 1$ and (b) $i = 2$ .....                                                                                                                                                                                                                                                                                                                                                                                                                                                                                                                                                               | s9 |
| S1.5 Kinetic deconvolution analysis.....                                                                                                                                                                                                                                                                                                                                                                                                                                                                                                                                                                                                                                                                                                                                                                                                                               | s9 |

\* Corresponding author; e-mail: nkoga@hiroshima-u.ac.jp

|                                                                                                                                                                                                                                                                                                                                                                                                                                                                                                                                                                                                                                                                                         |     |
|-----------------------------------------------------------------------------------------------------------------------------------------------------------------------------------------------------------------------------------------------------------------------------------------------------------------------------------------------------------------------------------------------------------------------------------------------------------------------------------------------------------------------------------------------------------------------------------------------------------------------------------------------------------------------------------------|-----|
| <b>Figure S13.</b> Typical KDA results for the thermal dehydration of CS-DH at different $p(\text{H}_2\text{O})$ values: (a) 3.19 kPa, (b) 5.18 kPa, (c) 7.72 kPa, and (d) 11.13 kPa. ....                                                                                                                                                                                                                                                                                                                                                                                                                                                                                              | s9  |
| <b>Table S3.</b> The kinetic parameters optimized via KDA and averaged over those at different $\beta$ values for individual reaction steps of the thermal dehydration of CS-DH at different $p(\text{H}_2\text{O})$ values .....                                                                                                                                                                                                                                                                                                                                                                                                                                                       | s10 |
| <b>S1.6</b> Isoconversional kinetic analysis for each reaction step at different $p(\text{H}_2\text{O})$ values .....                                                                                                                                                                                                                                                                                                                                                                                                                                                                                                                                                                   | s11 |
| <b>Figure S14.</b> The Friedman plots at various $\alpha$ values for the thermal dehydration of CS-DH to anhydride at different $p(\text{H}_2\text{O})$ values: (a) 0.18 and (b) 1.07 kPa. ....                                                                                                                                                                                                                                                                                                                                                                                                                                                                                         | s11 |
| <b>Figure S15.</b> Kinetic results of the conventional isoconversional analysis for the thermal dehydration of CS-DH to anhydride at $p(\text{H}_2\text{O})$ of 0.18 and 1.07 kPa: (a) Friedman plots at $\alpha = 0.5$ , (b) $E_a$ values at different $\alpha$ , and (c) experimental master plots of $(d\alpha/d\theta)_\alpha/(d\alpha/d\theta)_{0.5}$ versus $\alpha$ . ....                                                                                                                                                                                                                                                                                                       | s11 |
| <b>Figure S16.</b> The Friedman plots at various $\alpha_1$ for the thermal dehydration of CS-DH to CS-HH intermediate at different $p(\text{H}_2\text{O})$ values: (a) 1.07, (b) 3.19, (c) 5.18, (d) 7.72 and (e) 11.13 kPa. ....                                                                                                                                                                                                                                                                                                                                                                                                                                                      | s12 |
| <b>Figure S17.</b> Kinetic results of the conventional isoconversional analysis for the thermal dehydration of CS-DH to CS-HH intermediate at $p(\text{H}_2\text{O})$ of 1.07, 3.19, 5.18, 7.72, and 11.13 kPa: (a) Friedman plots at $\alpha_1 = 0.5$ , (b) $E_{a,1}$ values at different $\alpha_1$ values, and (c) experimental master plots of $(d\alpha_1/d\theta_1)_{\alpha_1}/(d\alpha_1/d\theta_1)_{0.5}$ versus $\alpha_1$ . ....                                                                                                                                                                                                                                              | s13 |
| <b>Figure S18.</b> The Friedman plots at various $\alpha_2$ values for the thermal dehydration of CS-HH intermediate to anhydride at different $p(\text{H}_2\text{O})$ values: (a) 3.19, (b) 5.18, (c) 7.72, and (d) 11.13 kPa. ....                                                                                                                                                                                                                                                                                                                                                                                                                                                    | s14 |
| <b>Figure S19.</b> Kinetic results of the conventional isoconversional analysis for the thermal dehydration of CS-HH intermediate to anhydride at $p(\text{H}_2\text{O})$ of 3.19, 5.18, 7.72, and 11.13 kPa: (a) Friedman plots at $\alpha_2 = 0.5$ , (b) $E_{a,2}$ values at different $\alpha_2$ values, and experimental master plots of $(d\alpha_2/d\theta_2)_{\alpha_2}/(d\alpha_2/d\theta_2)_{0.5}$ versus $\alpha_2$ . ....                                                                                                                                                                                                                                                    | s15 |
| <b>Table S4.</b> The apparent kinetic parameters determined by the conventional isoconversional analysis without considering the effect of $p(\text{H}_2\text{O})$ for the thermal dehydration processes of CS-DH to anhydride, CS-DH to CS-HH intermediate, and CS-HH intermediate to anhydride at different $p(\text{H}_2\text{O})$ values .....                                                                                                                                                                                                                                                                                                                                      | s16 |
| <b>S2.</b> Kinetics of the thermal dehydration of the CS-HH reagent at different atmospheric $p(\text{H}_2\text{O})$ values .....                                                                                                                                                                                                                                                                                                                                                                                                                                                                                                                                                       | s17 |
| <b>Figure S20.</b> TG–DTG curves for the thermal dehydration of CS-HH reagent under linear nonisothermal conditions at different $\beta$ values, recorded in flowing $\text{N}_2\text{--H}_2\text{O}$ mixed gas characterized by different $p(\text{H}_2\text{O})$ values: (a) $p(\text{H}_2\text{O}) = 1.18 \pm 0.03$ kPa ( $m_0 = 9.99 \pm 0.03$ mg), (b) $p(\text{H}_2\text{O}) = 3.65 \pm 0.07$ kPa ( $m_0 = 10.00 \pm 0.04$ mg), (c) $p(\text{H}_2\text{O}) = 6.32 \pm 0.16$ kPa ( $m_0 = 9.98 \pm 0.02$ mg), (d) $p(\text{H}_2\text{O}) = 9.11 \pm 0.18$ kPa ( $m_0 = 9.99 \pm 0.04$ mg), and (e) $p(\text{H}_2\text{O}) = 13.07 \pm 0.11$ kPa ( $m_0 = 10.01 \pm 0.04$ mg). .... | s17 |
| <b>Figure S21.</b> The Friedman plots for the thermal dehydration of the CS-HH reagent at different $p(\text{H}_2\text{O})$ values..                                                                                                                                                                                                                                                                                                                                                                                                                                                                                                                                                    | s18 |
| <b>Figure S22.</b> The universal Friedman plots for the thermal dehydration of the CS-HH reagent over different $p(\text{H}_2\text{O})$ values. ....                                                                                                                                                                                                                                                                                                                                                                                                                                                                                                                                    | s19 |
| <b>Figure S23.</b> The universal Friedman plots for the thermal dehydration of the CS-HH reagent over different $p(\text{H}_2\text{O})$ values, performed by setting the exponents ( $a_2$ , $b_2$ ) in the AF as the average values (3.26, 1.60).....                                                                                                                                                                                                                                                                                                                                                                                                                                  | s19 |

S1. Kinetics of the thermal dehydration of CS-DH at different atmospheric  $p(\text{H}_2\text{O})$  values

## S1.1 Mass-loss traces under isothermal conditions

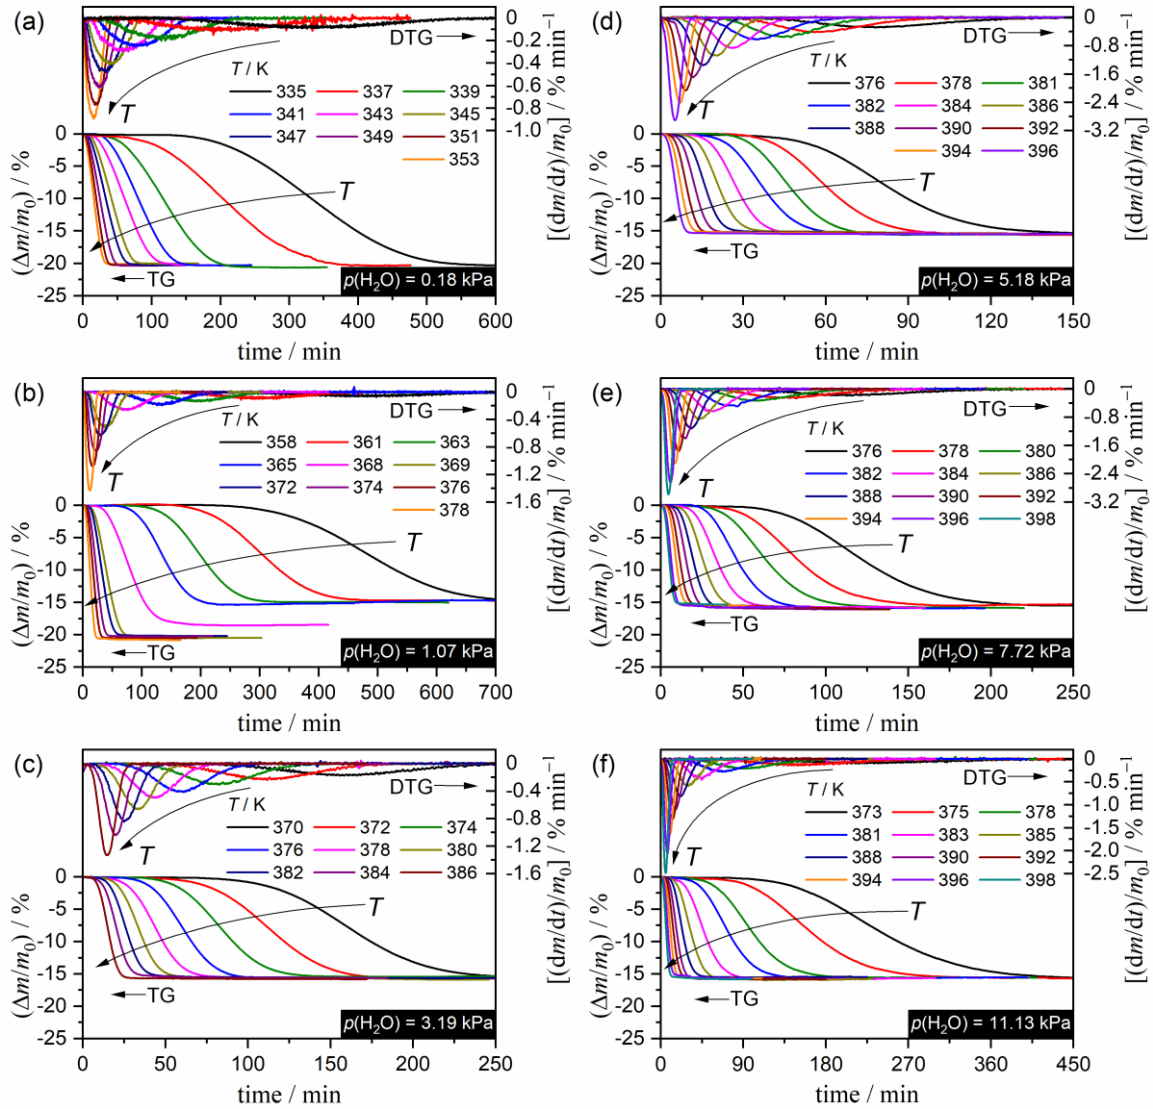

**Figure S1.** TG–DTG curves recorded under isothermal conditions at different temperatures in a flow of  $\text{N}_2\text{--H}_2\text{O}$  mixed gas ( $q_v = 400 \text{ cm}^3 \text{ min}^{-1}$ ) characterized by different  $p(\text{H}_2\text{O})$  values: (a)  $p(\text{H}_2\text{O}) = 0.18 \text{ kPa}$  ( $m_0 = 5.071 \pm 0.170 \text{ mg}$ ), (b)  $p(\text{H}_2\text{O}) = 1.07 \text{ kPa}$  ( $m_0 = 5.003 \pm 0.026 \text{ mg}$ ), (c)  $p(\text{H}_2\text{O}) = 3.19 \text{ kPa}$  ( $m_0 = 5.032 \pm 0.148 \text{ mg}$ ), (d)  $p(\text{H}_2\text{O}) = 5.18 \text{ kPa}$  ( $m_0 = 5.043 \pm 0.147 \text{ mg}$ ), (e)  $p(\text{H}_2\text{O}) = 7.72 \text{ kPa}$  ( $m_0 = 4.991 \pm 0.093 \text{ mg}$ ), and (f)  $p(\text{H}_2\text{O}) = 11.13 \text{ kPa}$  ( $m_0 = 4.988 \pm 0.100 \text{ mg}$ ).

## S1.2 Induction period

**Table S1.** Arrhenius parameters for the IP processes of the thermal dehydration of CS-DH at each  $p(\text{H}_2\text{O})$  value, determined by the conventional Arrhenius-type plots without considering the effect of  $p(\text{H}_2\text{O})$

| Subsequent reaction           | $p(\text{H}_2\text{O}) / \text{kPa}$ | $E_{a,\text{IP}} / \text{kJ mol}^{-1}$ | $\ln[A_{\text{IP}}f(\alpha_{\text{IP}}) / \text{s}^{-1}]$ | $-\gamma^a$ |
|-------------------------------|--------------------------------------|----------------------------------------|-----------------------------------------------------------|-------------|
| CS-DH $\rightarrow$ Anhydride | 0.18                                 | $246.3 \pm 8.4$                        | $76.8 \pm 2.9$                                            | 0.9959      |
|                               | 1.07                                 | $355.0 \pm 33.4$                       | $108.5 \pm 10.8$                                          | 0.9870      |
| CS-DH $\rightarrow$ CS-HH     | 1.07                                 | $198.4 \pm 5.0$                        | $57.0 \pm 1.7$                                            | 0.9993      |
|                               | 3.12                                 | $213.4 \pm 6.3$                        | $60.9 \pm 2.0$                                            | 0.9969      |
|                               | 5.16                                 | $200.1 \pm 10.1$                       | $56.1 \pm 3.2$                                            | 0.9937      |
|                               | 7.71                                 | $213.6 \pm 5.2$                        | $60.2 \pm 1.7$                                            | 0.9976      |
|                               | 11.09                                | $213.9 \pm 4.7$                        | $60.2 \pm 1.5$                                            | 0.9983      |

<sup>a</sup>Correlation coefficient of the linear regression analysis for the Arrhenius plot.

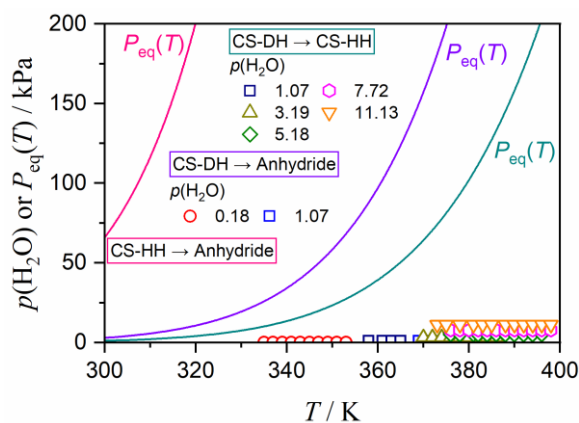

**Figure S2.** Temperature dependences of  $P_{eq}(T)$  for the thermal dehydrations of CS-DH to anhydride, CS-DH to CS-HH, and CS-HH to anhydride, calculated based on a thermodynamic database (MALT-2, Kagaku-Gijyutusha), together with the experimentally applied  $(T, p(\text{H}_2\text{O}))$  values.

### S1.3 Mass-loss traces under linear nonisothermal conditions

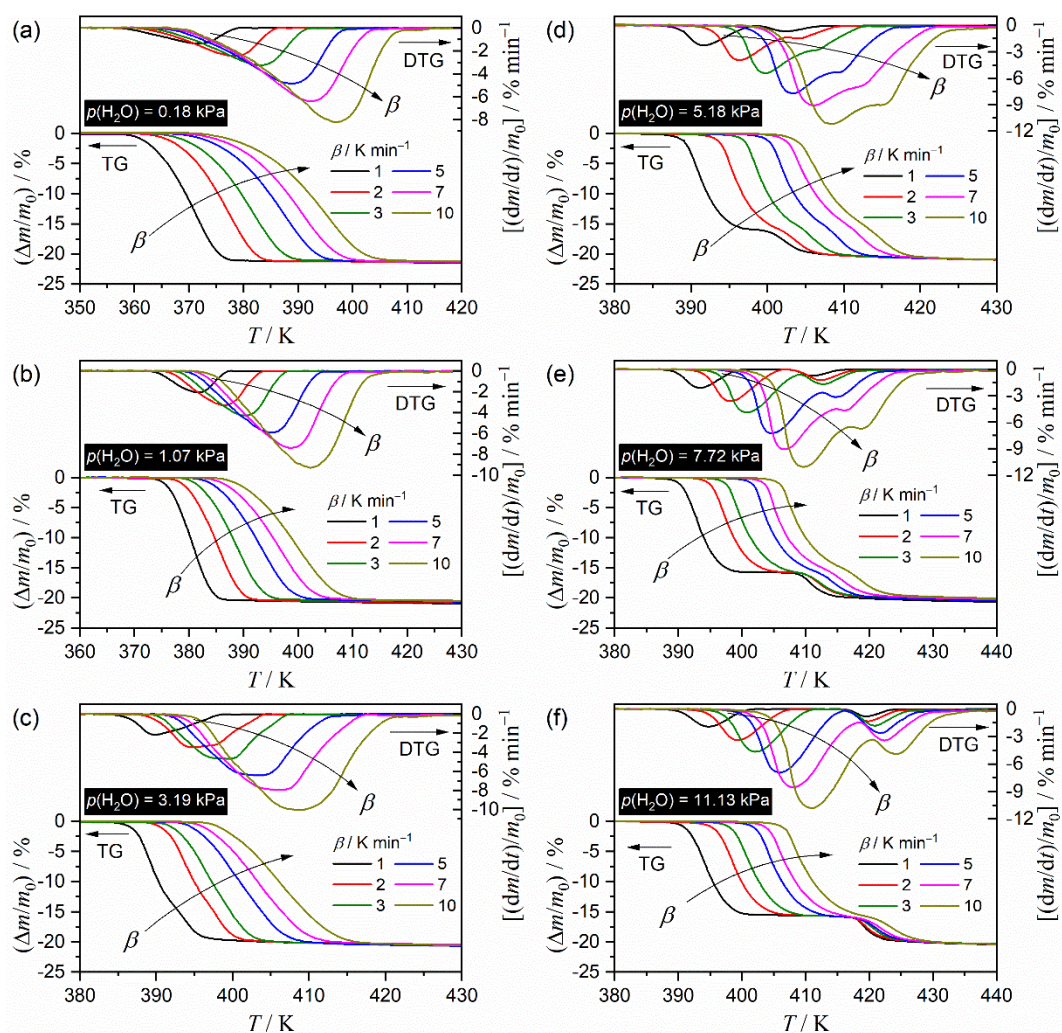

**Figure S3.** TG–DTG curves for the thermal dehydration of CS-DH recorded under linear nonisothermal conditions at different  $\beta$  values in a flow of the  $\text{N}_2$ – $\text{H}_2\text{O}$  mixed gas ( $q_v = 400 \text{ cm}^3 \text{ min}^{-1}$ ) characterized by different  $p(\text{H}_2\text{O})$  values: (a)  $p(\text{H}_2\text{O}) = 0.18 \text{ kPa}$  ( $m_0 = 5.104 \pm 0.242 \text{ mg}$ ), (b)  $p(\text{H}_2\text{O}) = 1.07 \text{ kPa}$  ( $m_0 = 5.004 \pm 0.032 \text{ mg}$ ), (c)  $p(\text{H}_2\text{O}) = 3.19 \text{ kPa}$  ( $m_0 = 5.045 \pm 0.162 \text{ mg}$ ), (d)  $p(\text{H}_2\text{O}) = 5.18 \text{ kPa}$  ( $m_0 = 4.807 \pm 0.135 \text{ mg}$ ), (e)  $p(\text{H}_2\text{O}) = 7.72 \text{ kPa}$  ( $m_0 = 5.007 \pm 0.024 \text{ mg}$ ), and (f)  $p(\text{H}_2\text{O}) = 11.13 \text{ kPa}$  ( $m_0 = 4.953 \pm 0.074 \text{ mg}$ ).

## S1.4 Mathematical deconvolution analysis

MDA was performed for the partially overlapping two-step thermal dehydration process observed under linear nonisothermal conditions at  $p(\text{H}_2\text{O}) = 3.19, 5.18, 7.72,$  and  $11.13$  kPa. The Weibull function (eq. (S1)) was selected as an appropriate statistical function.

$$F(t) = a_0 \left( \frac{a_3 - 1}{a_3} \right)^{\frac{1-a_3}{a_3}} \left\{ \frac{t - a_1}{a_2} + \left( \frac{a_3 - 1}{a_3} \right)^{\frac{1}{a_3}} \right\}^{a_3 - 1} \times \exp \left[ - \left\{ \frac{t - a_1}{a_2} + \left( \frac{a_3 - 1}{a_3} \right)^{\frac{1}{a_3}} \right\}^{a_3} + \frac{a_3 - 1}{a_3} \right] \quad (\text{S1})$$

where  $t$  is time and  $a_0$ – $a_3$  are the parameters characterizing the amplitude, center, width, and shape, respectively. Figure S4 shows typical MDA results applied to the DTG curves at different  $p(\text{H}_2\text{O})$  values. The overlapping degree decreases with the increasing  $p(\text{H}_2\text{O})$  values. The ratio of the separated peak areas for the first and second peaks were estimated to be approximately 3:1, corresponding to the two-step process composed of the thermal dehydration of CS-DH to anhydride via CS-HH. However, an increase in the contribution of the first reaction step was clearly observed with the increasing  $p(\text{H}_2\text{O})$  value (Table S2).

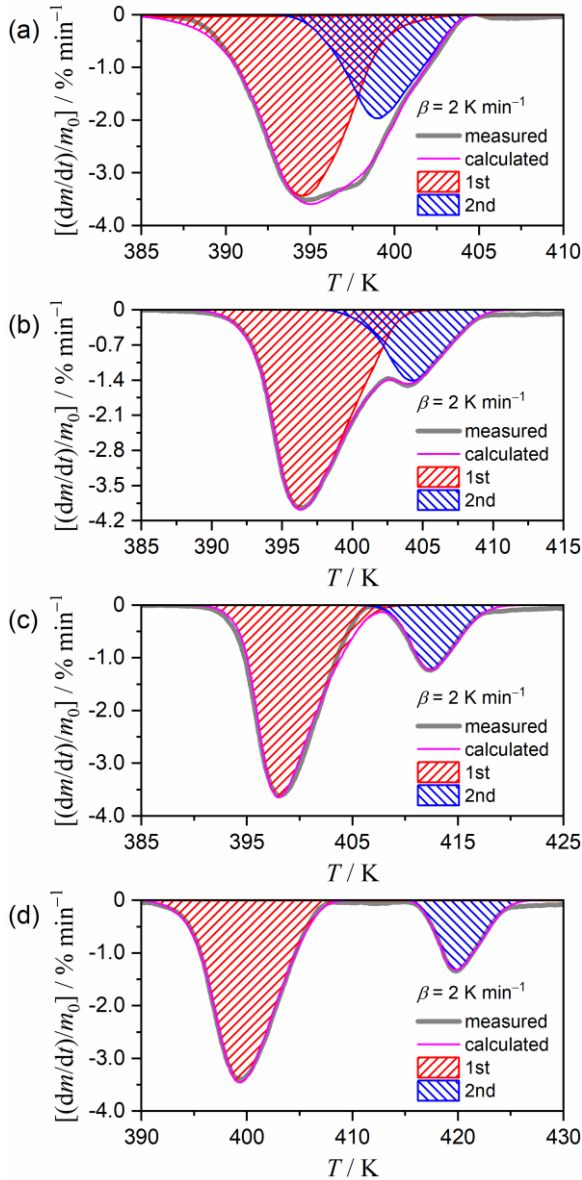

**Figure S4.** Typical MDA results for the two-step mass-loss process of the thermal dehydration of CS-DH to anhydride via CS-HH at different  $p(\text{H}_2\text{O})$  values: (a) 3.19, (b) 5.18, (c) 7.72, and (d) 11.13 kPa.

**Table S2.** The results of MDA and subsequent isoconversional kinetic analysis of the mathematically separated kinetic curves for the thermal dehydrations of CS-DH to CS-HH and CS-HH to anhydride at different  $p(\text{H}_2\text{O})$  values

| $i$ | $p(\text{H}_2\text{O}) / \text{kPa}$ | $c_i$           | $E_{a,i} / \text{kJ mol}^{-1}, \text{ }^a$ | $\frac{d\alpha_i}{d\theta_i} = A_i \alpha_i^{m_i} (1 - \alpha_i)^{n_i} [-\ln(1 - \alpha_i)]^{p_i}$ |                  |                 |                 | $R^2, \text{ }^b$ |
|-----|--------------------------------------|-----------------|--------------------------------------------|----------------------------------------------------------------------------------------------------|------------------|-----------------|-----------------|-------------------|
|     |                                      |                 |                                            | $A_i / \text{s}^{-1}$                                                                              | $m_i$            | $n_i$           | $p_i$           |                   |
| 1   | 3.19                                 | $0.76 \pm 0.02$ | $119.2 \pm 1.9$                            | $(6.19 \pm 0.04) \times 10^{13}$                                                                   | $-0.18 \pm 0.06$ | $1.11 \pm 0.02$ | $0.90 \pm 0.05$ | 0.9998            |
|     | 5.18                                 | $0.79 \pm 0.02$ | $127.8 \pm 3.8$                            | $(8.43 \pm 0.07) \times 10^{14}$                                                                   | $0.20 \pm 0.07$  | $1.11 \pm 0.03$ | $0.50 \pm 0.07$ | 0.9996            |
|     | 7.72                                 | $0.79 \pm 0.02$ | $145.4 \pm 4.3$                            | $(1.49 \pm 0.01) \times 10^{17}$                                                                   | $0.01 \pm 0.07$  | $1.24 \pm 0.03$ | $0.70 \pm 0.07$ | 0.9998            |
|     | 11.13                                | $0.80 \pm 0.01$ | $143.1 \pm 3.4$                            | $(5.50 \pm 0.03) \times 10^{16}$                                                                   | $-0.51 \pm 0.09$ | $1.38 \pm 0.04$ | $1.19 \pm 0.09$ | 0.9996            |
| 2   | 3.19                                 | $0.24 \pm 0.02$ | $137.7 \pm 2.7$                            | $(2.15 \pm 0.01) \times 10^{16}$                                                                   | $0.17 \pm 0.03$  | $1.07 \pm 0.01$ | $0.53 \pm 0.03$ | 0.9999            |
|     | 5.18                                 | $0.21 \pm 0.02$ | $209.2 \pm 10.9$                           | $(1.51 \pm 0.01) \times 10^{25}$                                                                   | $-0.11 \pm 0.06$ | $1.19 \pm 0.02$ | $0.69 \pm 0.06$ | 0.9997            |
|     | 7.72                                 | $0.21 \pm 0.02$ | $351.2 \pm 20.7$                           | $(4.60 \pm 0.06) \times 10^{42}$                                                                   | $0.06 \pm 0.09$  | $1.24 \pm 0.03$ | $0.37 \pm 0.09$ | 0.9996            |
|     | 11.13                                | $0.20 \pm 0.01$ | $528.2 \pm 48.7$                           | $(8.12 \pm 0.03) \times 10^{63}$                                                                   | $-1.05 \pm 0.07$ | $1.92 \pm 0.03$ | $1.43 \pm 0.07$ | 0.9999            |

<sup>a</sup> Averaged over  $0.1 \leq \alpha_i \leq 0.9$ .<sup>b</sup> Determination coefficient of the nonlinear least-squares analysis for fitting the experimental master plot with  $\text{SB}(m_i, n_i, p_i)$  function.

From the MDA results, a series of kinetic curves at different  $\beta$  values were obtained for each reaction step at different  $p(\text{H}_2\text{O})$  values as shown in Figures S5–S8. The individual kinetic curve series subjected to an isoconversional kinetic analysis based on eq. (12). Figures S9 and S10 show the Friedman plots at different  $p(\text{H}_2\text{O})$  values for the first and second reaction steps, respectively. Generally, the Friedman plots exhibited statistically significant linear correlations irrespective of the  $\alpha_i$  value. The  $E_{a,i}$  values at different  $\alpha_i$  values are shown in Figure S11. In each reaction step, the  $E_{a,i}$  values increased with the increasing  $p(\text{H}_2\text{O})$  value. The  $E_{a,i}$  values averaged over  $0.1 \leq \alpha_i \leq 0.9$  are also listed in Table S2.



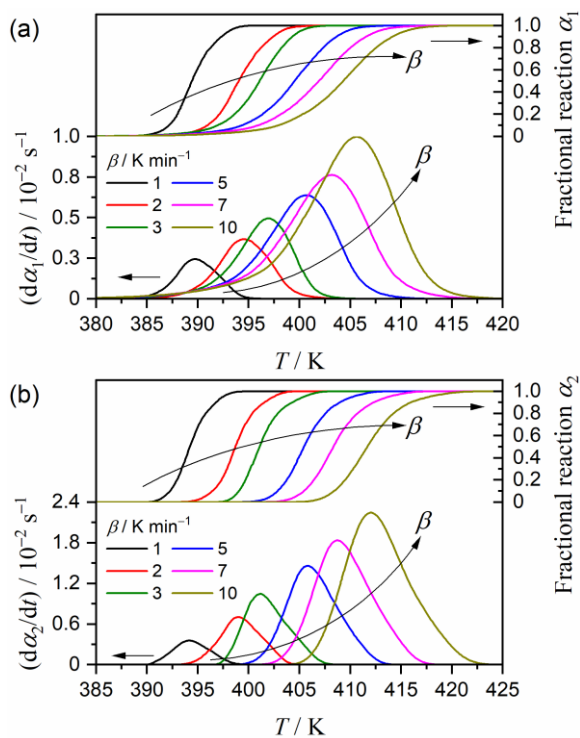

**Figure S5.** Series of kinetic curves at different  $\beta$  values for each reaction step of the thermal dehydration of CS-DH to anhydride via CS-HH intermediate at  $p(\text{H}_2\text{O}) = 3.19$  kPa: (a)  $i = 1$  and (b)  $i = 2$ .

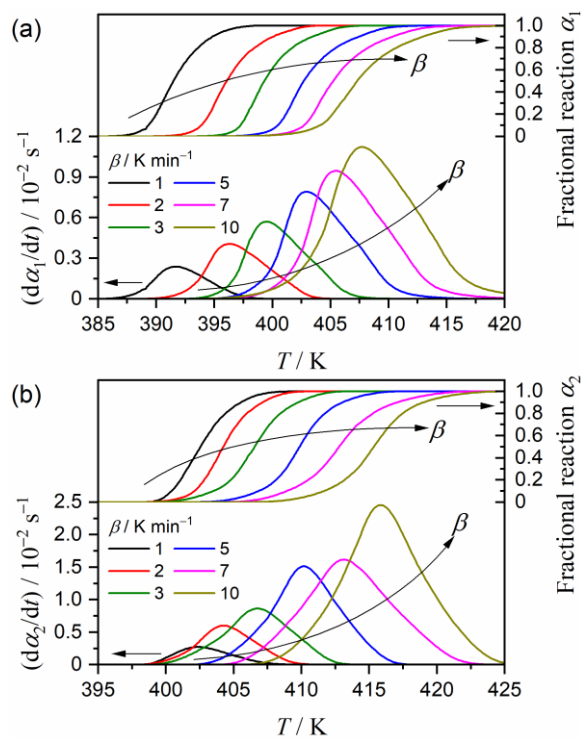

**Figure S7.** Series of kinetic curves at different  $\beta$  values for each reaction step of the thermal dehydration of CS-DH to anhydride via CS-HH intermediate at  $p(\text{H}_2\text{O}) = 7.72$  kPa: (a)  $i = 1$  and (b)  $i = 2$ .

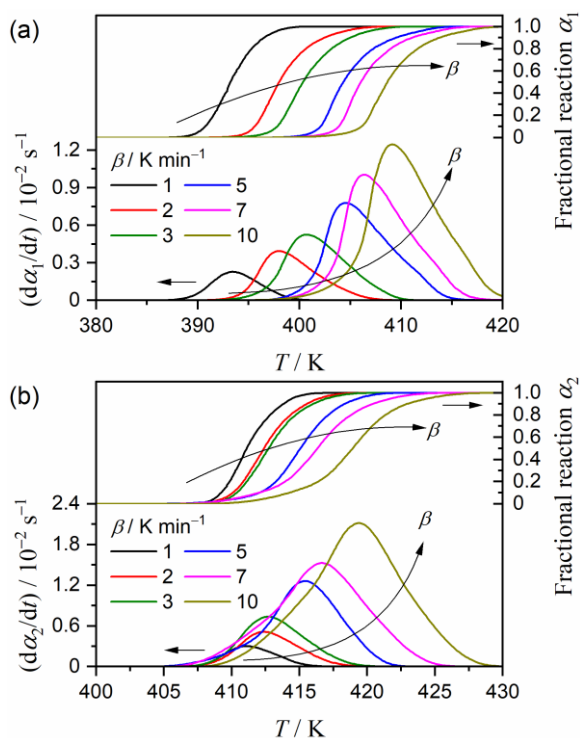

**Figure S6.** Series of kinetic curves at different  $\beta$  values for each reaction step of the thermal dehydration of CS-DH to anhydride via CS-HH intermediate at  $p(\text{H}_2\text{O}) = 5.18$  kPa: (a)  $i = 1$  and (b)  $i = 2$ .

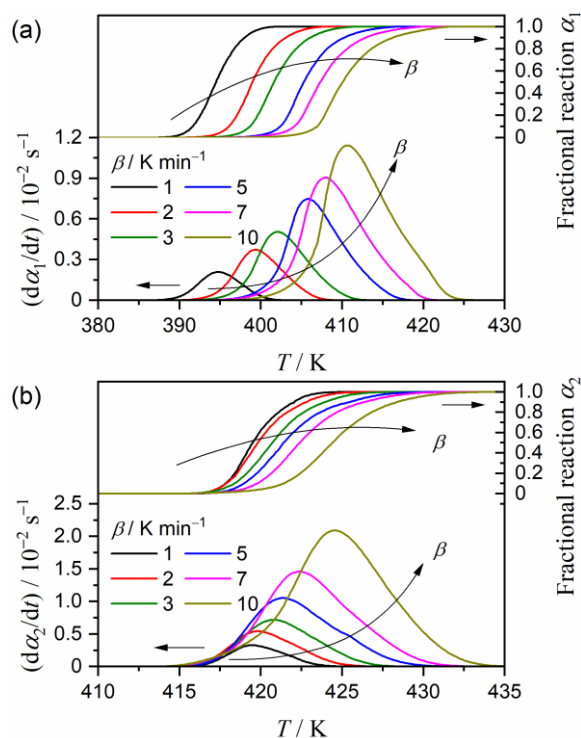

**Figure S8.** Series of kinetic curves at different  $\beta$  values for each reaction step of the thermal dehydration of CS-DH to anhydride via CS-HH intermediate at  $p(\text{H}_2\text{O}) = 11.13$  kPa: (a)  $i = 1$  and (b)  $i = 2$ .

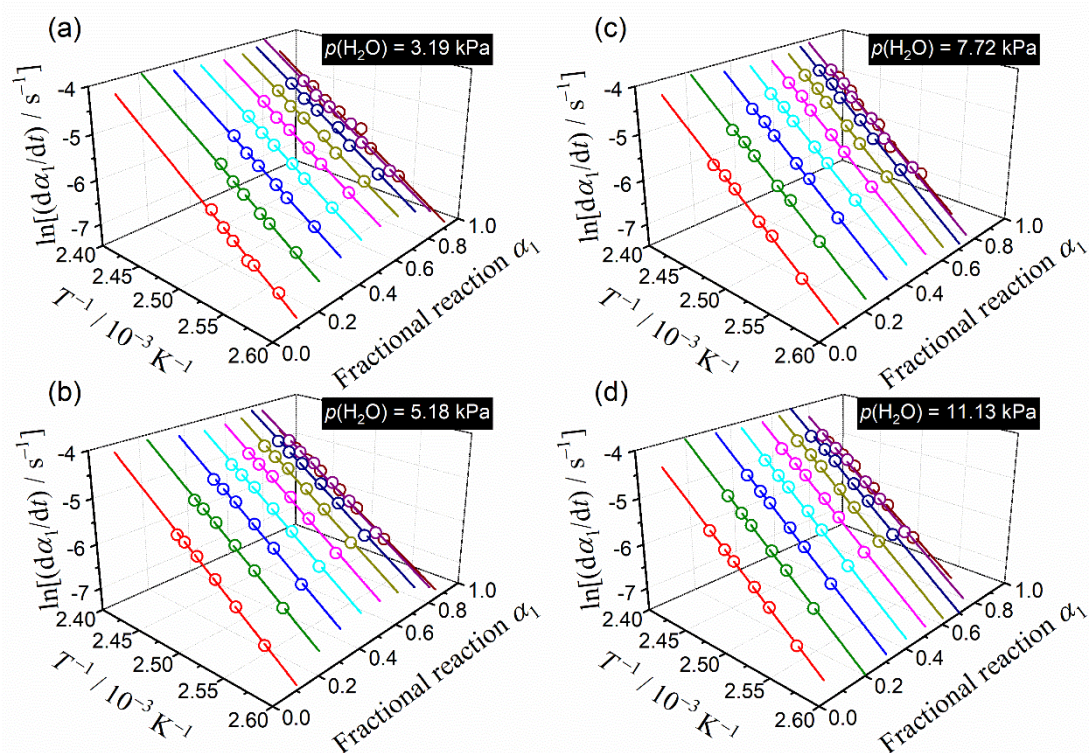

**Figure S9.** The Friedman plots at different  $\alpha_1$  values for the thermal dehydration of CS-DH to CS-HH intermediate at different  $p(\text{H}_2\text{O})$  values: (a) 3.19, (b) 5.18, (c) 7.72, and (d) 11.13 kPa.

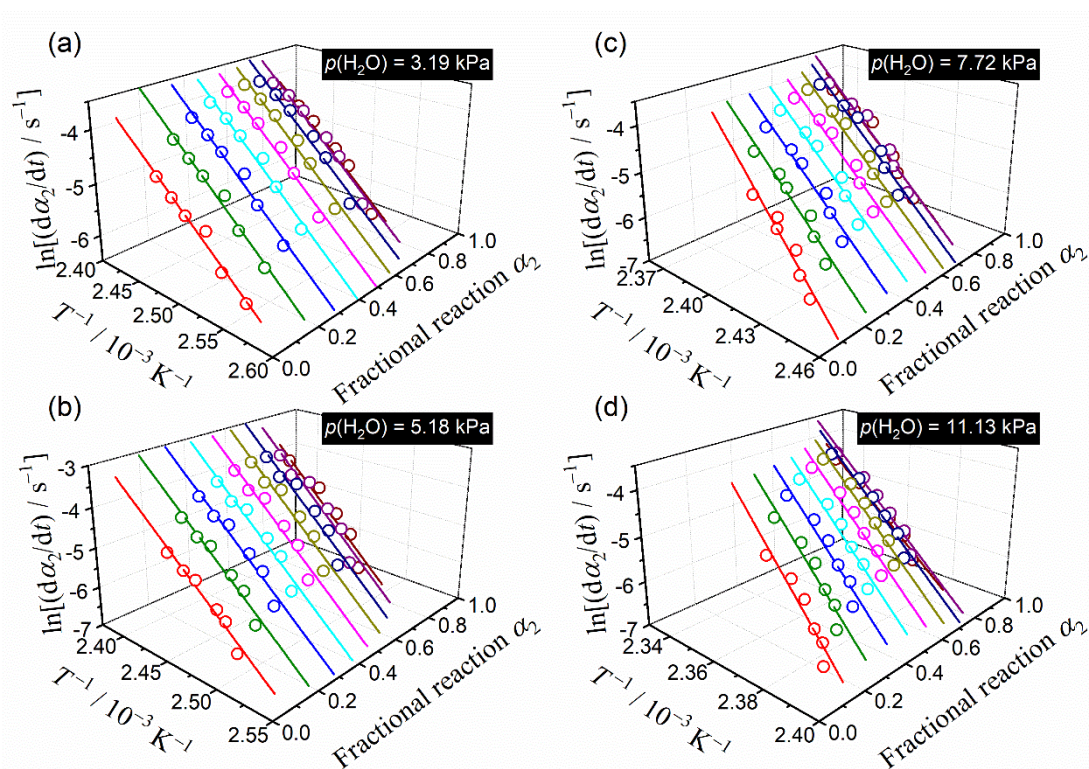

**Figure S10.** The Friedman plots at different  $\alpha_2$  values for the thermal dehydration of CS-HH intermediate to anhydride at different  $p(\text{H}_2\text{O})$  values: (a) 3.19, (b) 5.18, (c) 7.72, and (d) 11.13 kPa.



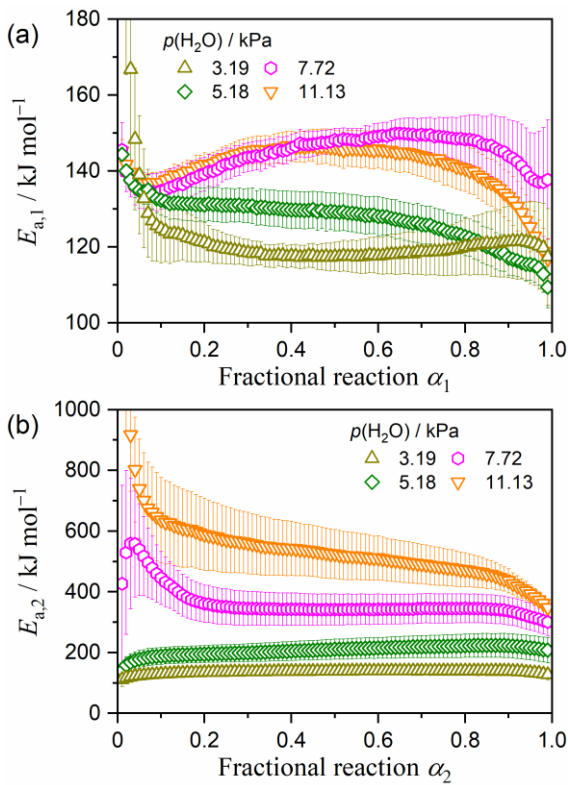

**Figure S11.**  $E_{a,i}$  values at different  $\alpha_i$  values for the individual reaction steps of the thermal dehydration of CS-DH at the respective  $p(\text{H}_2\text{O})$  values: (a)  $i = 1$  and (b)  $i = 2$ .

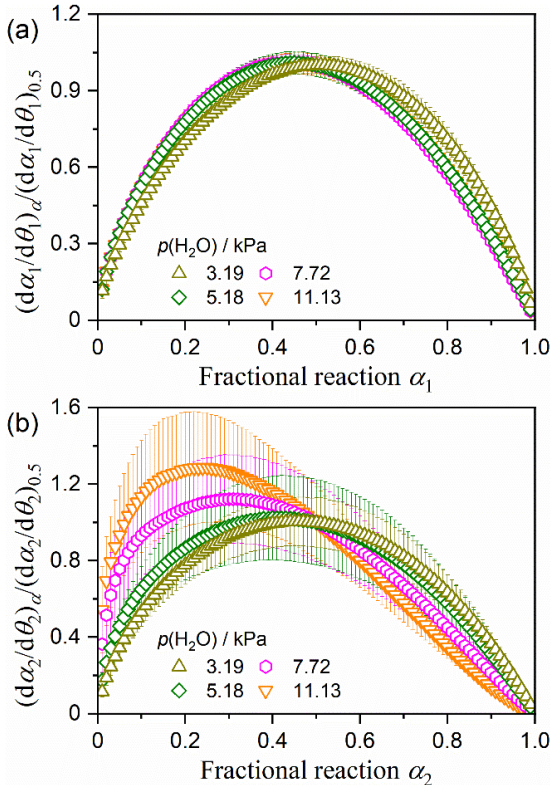

**Figure S12.** Experimental master plots of  $(d\alpha_i/d\theta_i)$  versus  $\alpha_i$  normalized by  $(d\alpha_i/d\theta_i)$  at  $\alpha_i = 0.5$  at different  $p(\text{H}_2\text{O})$  values for the individual reaction steps of the thermal dehydration of CS-DH: (a)  $i = 1$  and (b)  $i = 2$ .

Figure S12 shows the experimental master plots of  $(d\alpha_i/d\theta_i)$  versus  $\alpha_i$  normalized by  $(d\alpha_i/d\theta_i)$  at  $\alpha_i = 0.5$ . Notably, the experimental master plots for the first mass-loss process were invariant irrespective of the  $p(\text{H}_2\text{O})$  value, wherein the maximum rate was observed midway through the first reaction step. Although the maximum rate appears midway through the second reaction step, the shapes of the experimental master plots vary with the  $p(\text{H}_2\text{O})$  value accompanied by the systematic shift of the  $\alpha_i$  value at the maximum rate to smaller values with the increasing  $p(\text{H}_2\text{O})$  values. All the experimental master plots were successfully fitted using  $\text{SB}(m_i, n_i, p_i)$  with the statistically significant correlations ( $R^2 > 0.999$ ). The  $A_i$  value and kinetic exponents in  $\text{SB}(m_i, n_i, p_i)$  obtained by the nonlinear least squares analysis for the fitting are listed in Table S2.

### S1.5 Kinetic deconvolution analysis

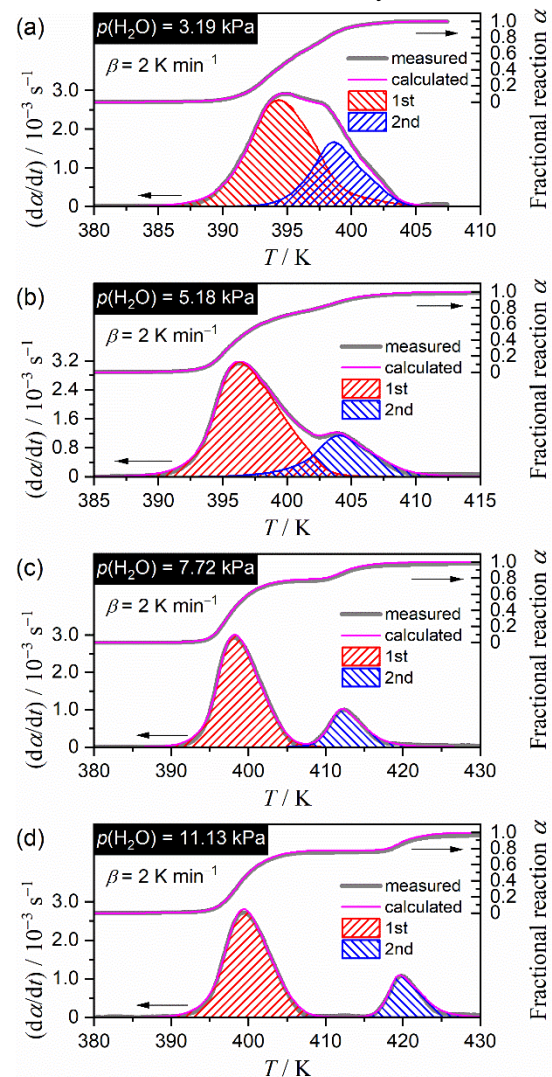

**Figure S13.** Typical KDA results for the thermal dehydration of CS-DH at different  $p(\text{H}_2\text{O})$  values: (a) 3.19 kPa, (b) 5.18 kPa, (c) 7.72 kPa, and (d) 11.13 kPa.

**Table S3.** The kinetic parameters optimized via KDA and averaged over those at different  $\beta$  values for individual reaction steps of the thermal dehydration of CS-DH at different  $p(\text{H}_2\text{O})$  values

| $p(\text{H}_2\text{O}) / \text{kPa}$ | $i$ | $c_i$           | $E_{a,i} / \text{kJ mol}^{-1}$ | $A_i / \text{s}^{-1}$            | $m_i$            | $n_i$           | $p_i$            | $R^2, ^a$           |
|--------------------------------------|-----|-----------------|--------------------------------|----------------------------------|------------------|-----------------|------------------|---------------------|
| 3.19                                 | 1   | $0.75 \pm 0.01$ | $122.5 \pm 0.9$                | $(1.82 \pm 0.58) \times 10^{14}$ | $0.08 \pm 0.31$  | $1.09 \pm 0.21$ | $0.61 \pm 0.35$  | $0.9979 \pm 0.0016$ |
|                                      | 2   | $0.25 \pm 0.01$ | $200.3 \pm 0.8$                | $(3.89 \pm 1.61) \times 10^{24}$ | $0.13 \pm 0.08$  | $1.50 \pm 0.18$ | $0.72 \pm 0.08$  |                     |
| 5.18                                 | 1   | $0.78 \pm 0.01$ | $126.3 \pm 0.9$                | $(6.12 \pm 1.51) \times 10^{14}$ | $0.43 \pm 0.32$  | $1.11 \pm 0.15$ | $0.36 \pm 0.34$  | $0.9994 \pm 0.0002$ |
|                                      | 2   | $0.22 \pm 0.01$ | $207.7 \pm 0.4$                | $(1.44 \pm 0.06) \times 10^{25}$ | $-0.10 \pm 0.01$ | $1.73 \pm 0.28$ | $0.93 \pm 0.02$  |                     |
| 7.72                                 | 1   | $0.80 \pm 0.02$ | $144.4 \pm 0.5$                | $(1.15 \pm 0.18) \times 10^{17}$ | $0.01 \pm 0.01$  | $1.35 \pm 0.07$ | $0.76 \pm 0.02$  | $0.9989 \pm 0.0002$ |
|                                      | 2   | $0.20 \pm 0.02$ | $349.3 \pm 0.7$                | $(4.33 \pm 0.50) \times 10^{42}$ | $0.07 \pm 0.01$  | $1.94 \pm 0.15$ | $0.63 \pm 0.04$  |                     |
| 11.13                                | 1   | $0.78 \pm 0.01$ | $141.2 \pm 1.1$                | $(3.65 \pm 0.97) \times 10^{16}$ | $0.87 \pm 1.03$  | $0.90 \pm 0.45$ | $-0.11 \pm 1.03$ | $0.9987 \pm 0.0001$ |
|                                      | 2   | $0.22 \pm 0.01$ | $519.1 \pm 0.8$                | $(8.26 \pm 1.26) \times 10^{62}$ | $0.06 \pm 0.01$  | $1.95 \pm 0.15$ | $0.47 \pm 0.13$  |                     |

<sup>a</sup> Determination coefficient of the nonlinear least-squares analysis of KDA.

S1.6 Isoconversional kinetic analysis for each reaction step at different  $p(\text{H}_2\text{O})$  values
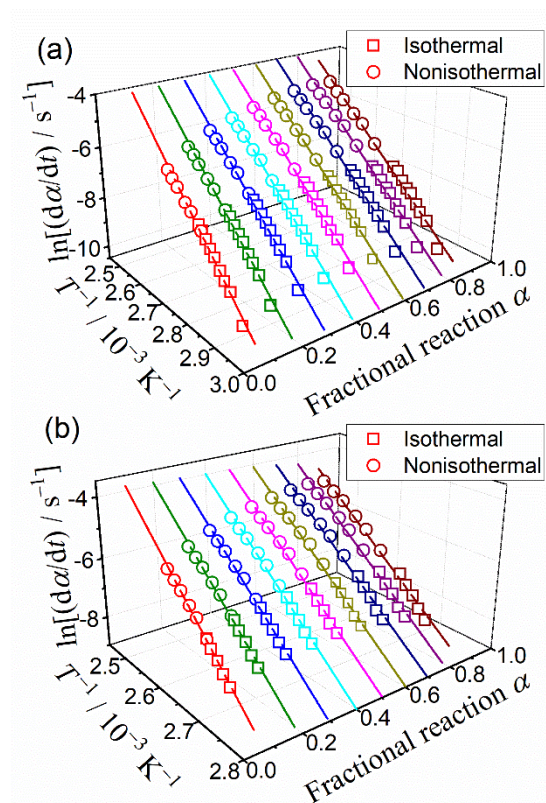

**Figure S14.** The Friedman plots at various  $\alpha$  values for the thermal dehydration of CS-DH to anhydride at different  $p(\text{H}_2\text{O})$  values: (a) 0.18 and (b) 1.07 kPa.

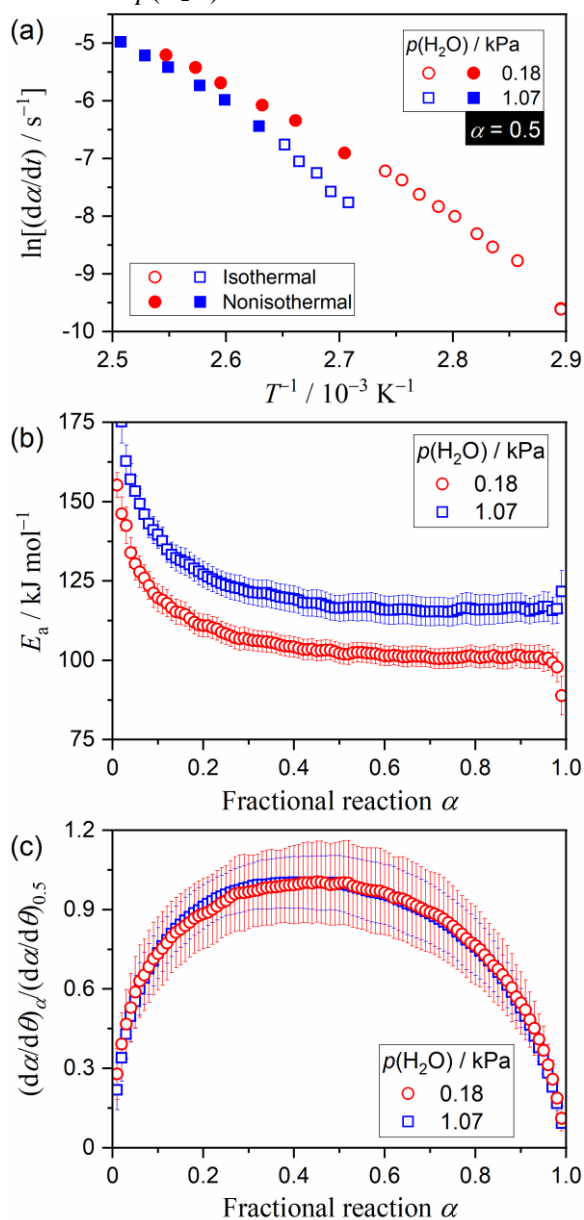

**Figure S15.** Kinetic results of the conventional isoconversional analysis for the thermal dehydration of CS-DH to anhydride at  $p(\text{H}_2\text{O})$  of 0.18 and 1.07 kPa: (a) Friedman plots at  $\alpha = 0.5$ , (b)  $E_a$  values at different  $\alpha$ , and (c) experimental master plots of  $(d\alpha/d\theta)_\alpha / (d\alpha/d\theta)_{0.5}$  versus  $\alpha$ .

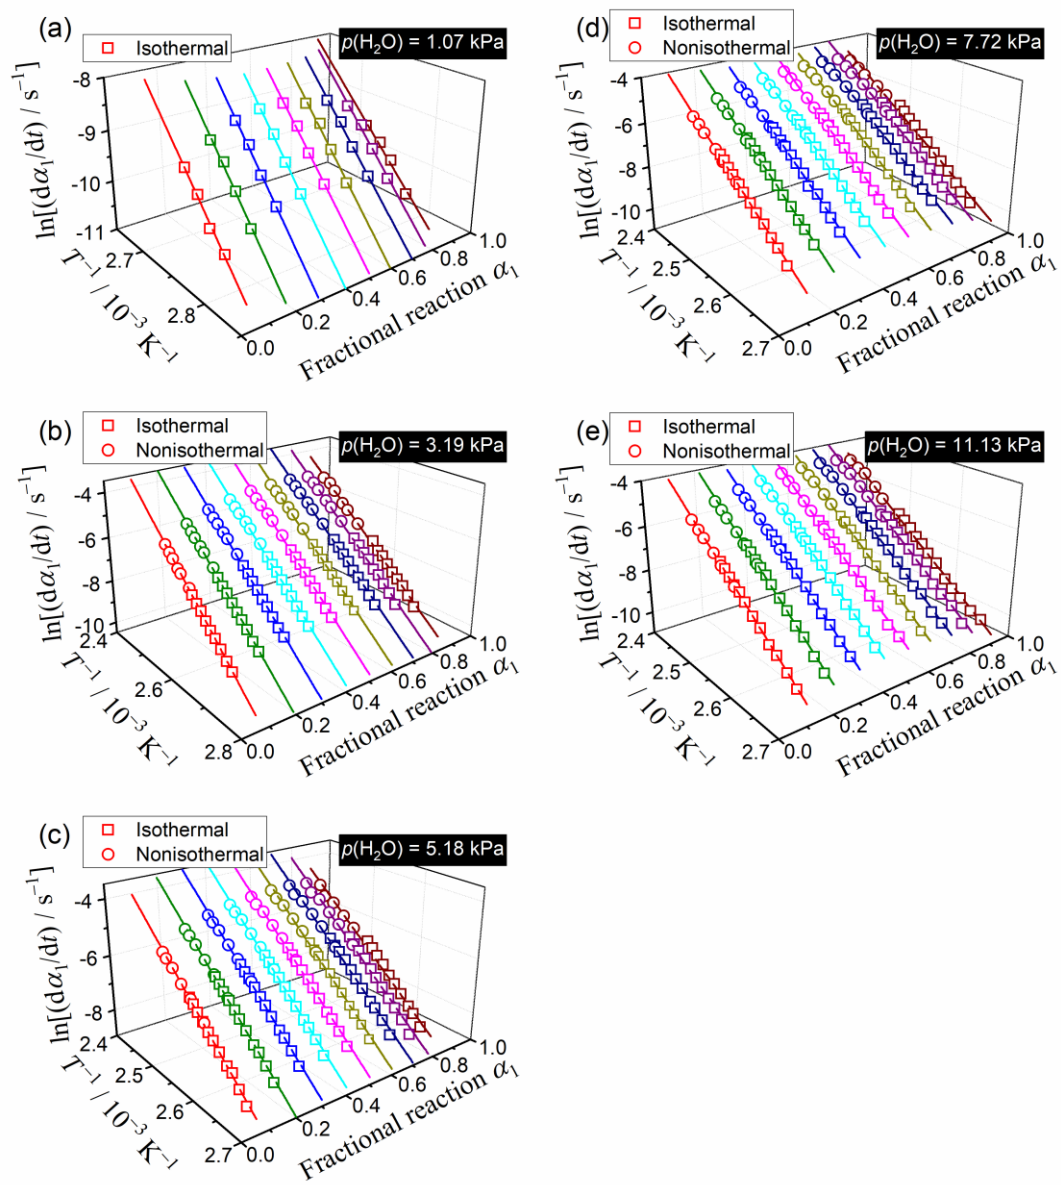

**Figure S16.** The Friedman plots at various  $\alpha_1$  for the thermal dehydration of CS-DH to CS-HH intermediate at different  $p(\text{H}_2\text{O})$  values: (a) 1.07, (b) 3.19, (c) 5.18, (d) 7.72 and (e) 11.13 kPa.



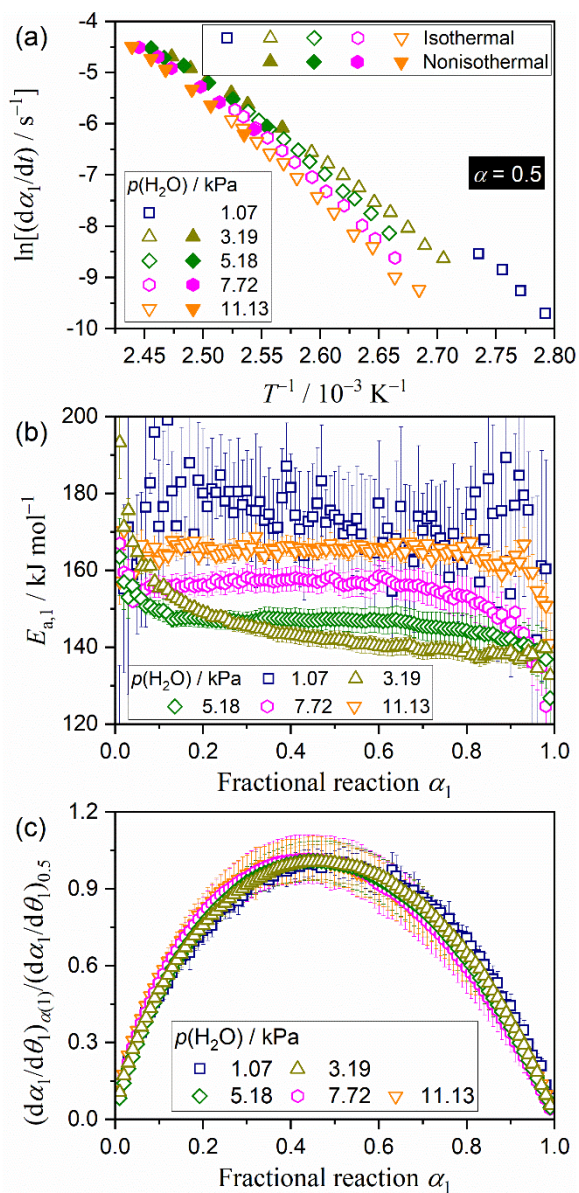

**Figure S17.** Kinetic results of the conventional isoconversional analysis for the thermal dehydration of CS-DH to CS-HH intermediate at  $p(\text{H}_2\text{O})$  of 1.07, 3.19, 5.18, 7.72, and 11.13 kPa: (a) Friedman plots at  $\alpha_1 = 0.5$ , (b)  $E_{a,1}$  values at different  $\alpha_1$  values, and (c) experimental master plots of  $(d\alpha_1/d\theta_1)_{\alpha_1} / (d\alpha_1/d\theta_1)_{0.5}$  versus  $\alpha_1$ .

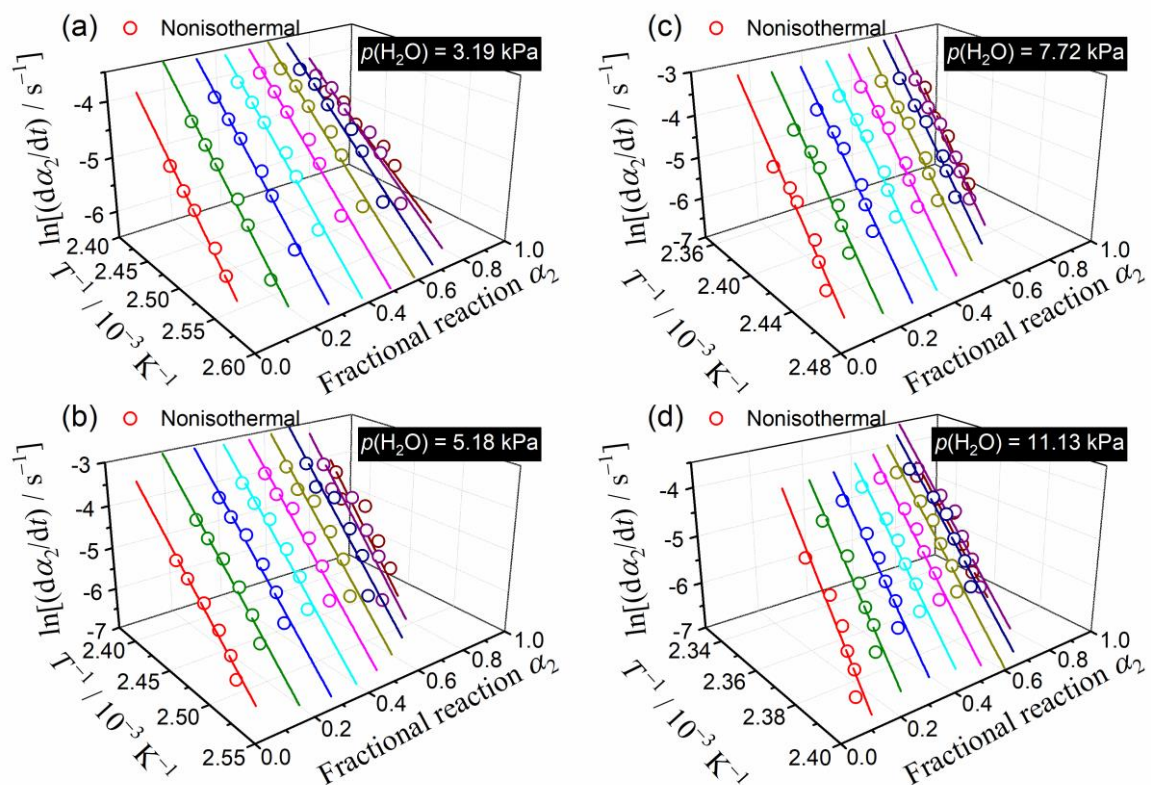

**Figure S18.** The Friedman plots at various  $\alpha_2$  values for the thermal dehydration of CS-HH intermediate to anhydride at different  $p(H_2O)$  values: (a) 3.19, (b) 5.18, (c) 7.72, and (d) 11.13 kPa.

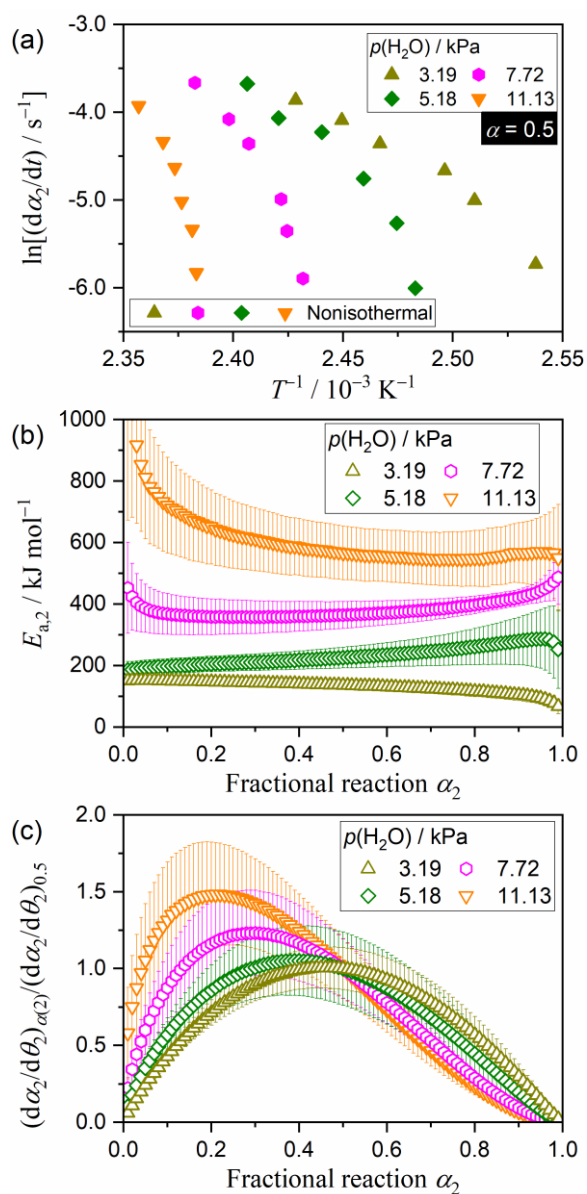

**Figure S19.** Kinetic results of the conventional isoconversional analysis for the thermal dehydration of CS-HH intermediate to anhydride at  $p(\text{H}_2\text{O})$  of 3.19, 5.18, 7.72, and 11.13 kPa: (a) Friedman plots at  $\alpha_2 = 0.5$ , (b)  $E_{a,2}$  values at different  $\alpha_2$  values, and (c) experimental master plots of  $(d\alpha_2/d\theta_2)_{\alpha_2} / (d\alpha_2/d\theta_2)_{0.5}$  versus  $\alpha_2$ .

**Table S4.** The apparent kinetic parameters determined by the conventional isoconversional analysis without considering the effect of  $p(\text{H}_2\text{O})$  for the thermal dehydration processes of CS-DH to anhydride, CS-DH to CS-HH intermediate, and CS-HH intermediate to anhydride at different  $p(\text{H}_2\text{O})$  values

| Reaction process                                      | $p(\text{H}_2\text{O}) / \text{kPa}$ | $E_{a,i} / \text{kJ mol}^{-1}, \text{ }^a$ | $\frac{d\alpha_i}{d\theta_i} = A_i \alpha_i^{m_i} (1 - \alpha_i)^{n_i} [-\ln(1 - \alpha_i)]^{p_i}$ |                  |                 |                  | $R^2, \text{ }^b$ |
|-------------------------------------------------------|--------------------------------------|--------------------------------------------|----------------------------------------------------------------------------------------------------|------------------|-----------------|------------------|-------------------|
|                                                       |                                      |                                            | $A_i / \text{s}^{-1}$                                                                              | $m_i$            | $n_i$           | $p_i$            |                   |
| CS-DH $\rightarrow$ anhydride<br>( $i = \text{non}$ ) | 0.18                                 | $104.8 \pm 4.9$                            | $(1.07 \pm 0.01) \times 10^{12}$                                                                   | $-0.84 \pm 0.08$ | $0.97 \pm 0.03$ | $1.20 \pm 0.08$  | 0.9986            |
|                                                       | 1.07                                 | $119.9 \pm 5.8$                            | $(7.80 \pm 0.14) \times 10^{13}$                                                                   | $-0.78 \pm 0.14$ | $1.01 \pm 0.05$ | $1.17 \pm 0.13$  | 0.9974            |
| CS-DH $\rightarrow$ CS-HH<br>( $i = 1$ )              | 1.07                                 | $173.1 \pm 8.3$                            | $(3.14 \pm 0.05) \times 10^{21}$                                                                   | $0.78 \pm 0.14$  | $0.77 \pm 0.05$ | $-0.05 \pm 0.14$ | 0.9985            |
|                                                       | 3.19                                 | $143.1 \pm 4.7$                            | $(9.34 \pm 0.04) \times 10^{16}$                                                                   | $0.26 \pm 0.04$  | $1.03 \pm 0.02$ | $0.46 \pm 0.03$  | 0.9999            |
|                                                       | 5.18                                 | $146.4 \pm 1.6$                            | $(2.60 \pm 0.02) \times 10^{17}$                                                                   | $1.12 \pm 0.06$  | $0.81 \pm 0.02$ | $-0.32 \pm 0.06$ | 0.9998            |
|                                                       | 7.72                                 | $155.6 \pm 2.8$                            | $(3.51 \pm 0.04) \times 10^{18}$                                                                   | $1.35 \pm 0.10$  | $0.75 \pm 0.04$ | $-0.57 \pm 0.10$ | 0.9996            |
|                                                       | 11.13                                | $165.1 \pm 1.7$                            | $(4.73 \pm 0.04) \times 10^{19}$                                                                   | $1.41 \pm 0.07$  | $0.66 \pm 0.03$ | $-0.68 \pm 0.07$ | 0.9997            |
| CS-HH $\rightarrow$ anhydride<br>( $i = 2$ )          | 3.19                                 | $133.4 \pm 12.6$                           | $(7.43 \pm 0.02) \times 10^{15}$                                                                   | $0.36 \pm 0.03$  | $1.30 \pm 0.01$ | $0.55 \pm 0.03$  | 0.9999            |
|                                                       | 5.18                                 | $230.2 \pm 22.9$                           | $(1.05 \pm 0.01) \times 10^{28}$                                                                   | $0.09 \pm 0.03$  | $1.57 \pm 0.01$ | $0.71 \pm 0.03$  | 0.9999            |
|                                                       | 7.72                                 | $373.2 \pm 17.6$                           | $(4.54 \pm 0.02) \times 10^{45}$                                                                   | $0.16 \pm 0.03$  | $1.91 \pm 0.02$ | $0.52 \pm 0.03$  | 0.9999            |
|                                                       | 11.13                                | $588.0 \pm 45.9$                           | $(2.68 \pm 0.01) \times 10^{71}$                                                                   | $-1.74 \pm 0.13$ | $2.71 \pm 0.06$ | $2.19 \pm 0.13$  | 0.9999            |

<sup>a</sup> Averaged over  $0.1 \leq \alpha_i \leq 0.9$ .<sup>b</sup> Determination coefficient of the nonlinear least-squares analysis for fitting the experimental master plots with  $\text{SB}(m_i, n_i, p_i)$  function.



S2. Kinetics of the thermal dehydration of the CS-HH reagent at different atmospheric  $p(\text{H}_2\text{O})$  values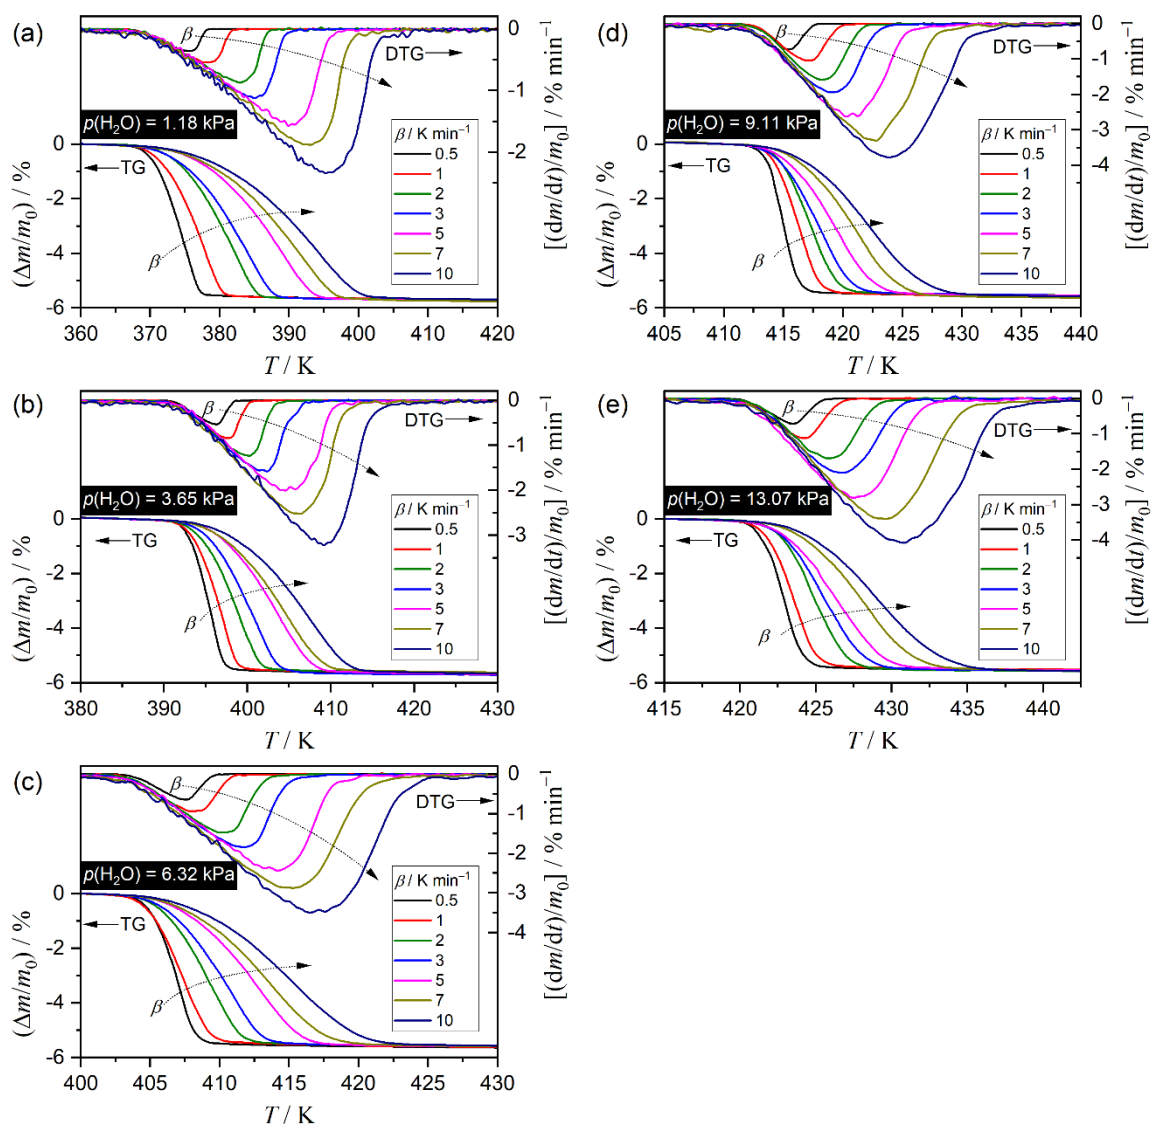

**Figure S20.** TG–DTG curves for the thermal dehydration of CS-HH reagent under linear nonisothermal conditions at different  $\beta$  values, recorded in flowing  $\text{N}_2$ – $\text{H}_2\text{O}$  mixed gas characterized by different  $p(\text{H}_2\text{O})$  values: (a)  $p(\text{H}_2\text{O}) = 1.18 \pm 0.03$  kPa ( $m_0 = 9.99 \pm 0.03$  mg), (b)  $p(\text{H}_2\text{O}) = 3.65 \pm 0.07$  kPa ( $m_0 = 10.00 \pm 0.04$  mg), (c)  $p(\text{H}_2\text{O}) = 6.32 \pm 0.16$  kPa ( $m_0 = 9.98 \pm 0.02$  mg), (d)  $p(\text{H}_2\text{O}) = 9.11 \pm 0.18$  kPa ( $m_0 = 9.99 \pm 0.04$  mg), and (e)  $p(\text{H}_2\text{O}) = 13.07 \pm 0.11$  kPa ( $m_0 = 10.01 \pm 0.04$  mg).

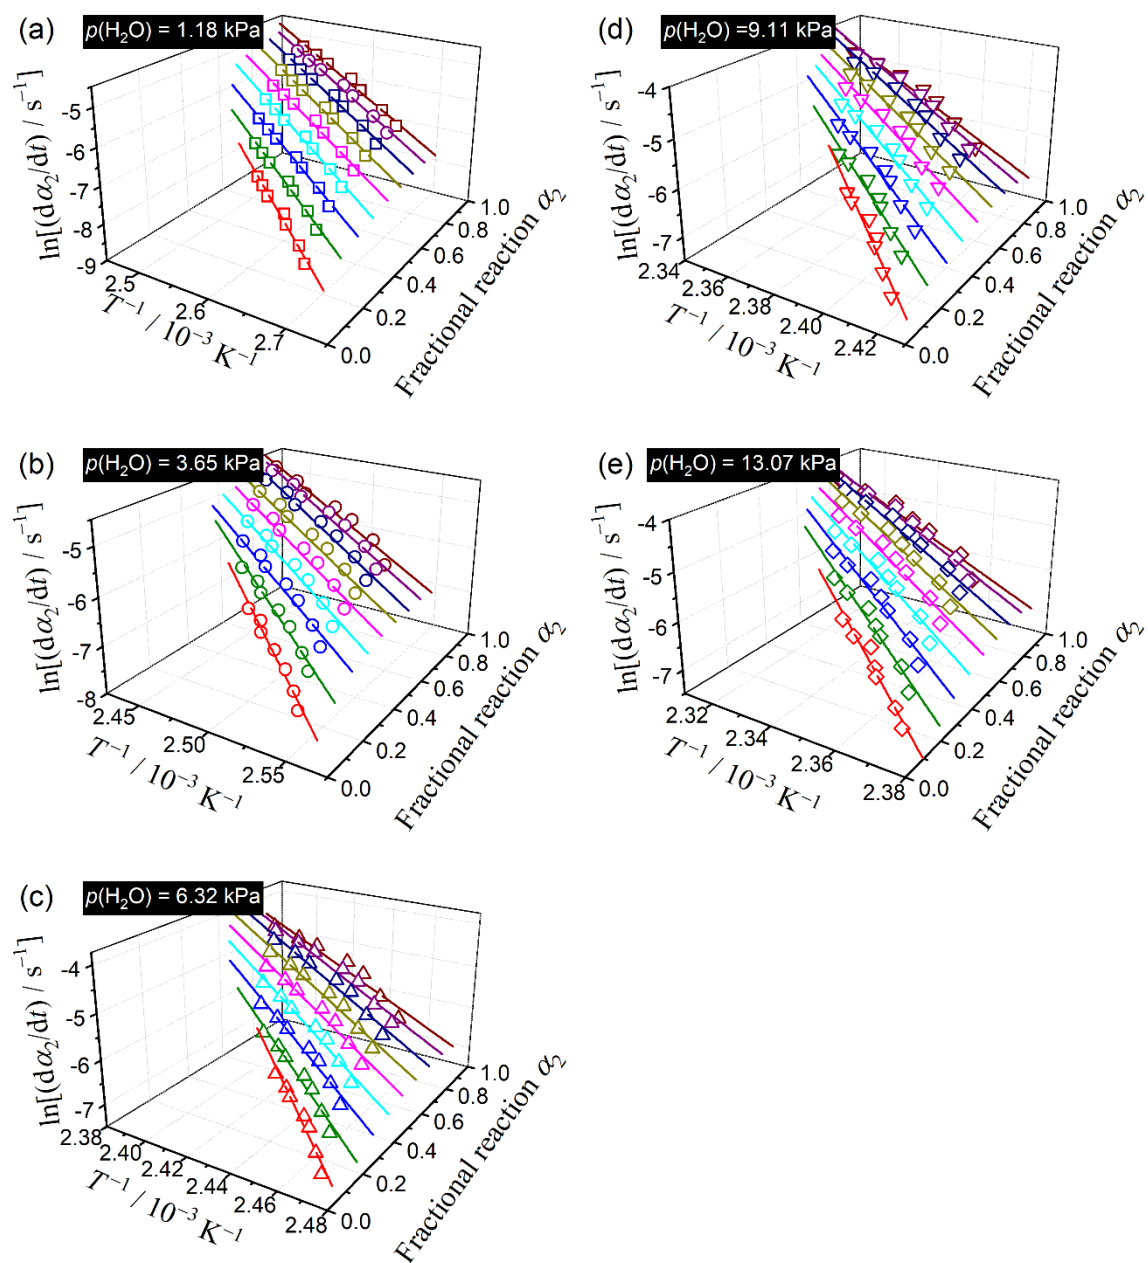

**Figure S21.** The Friedman plots for the thermal dehydration of the CS-HH reagent at different  $p(\text{H}_2\text{O})$  values.

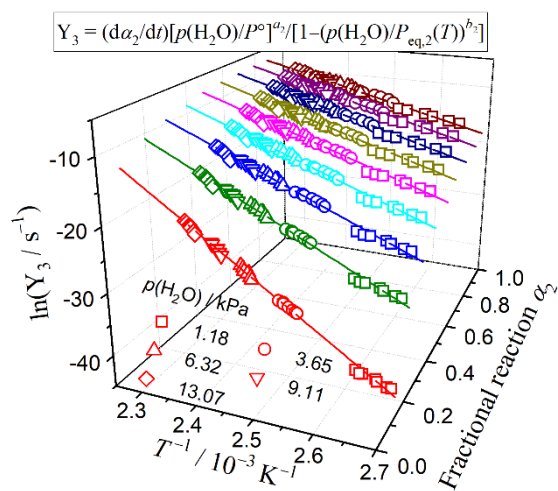

**Figure S22.** The universal Friedman plots for the thermal dehydration of the CS-HH reagent over different  $p(\text{H}_2\text{O})$  values.

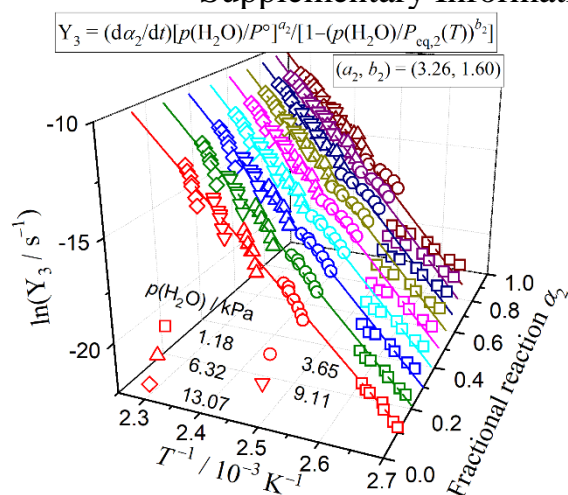

**Figure S23.** The universal Friedman plots for the thermal dehydration of the CS-HH reagent over different  $p(\text{H}_2\text{O})$  values, performed by setting the exponents  $(a_2, b_2)$  in the AF as the average values (3.26, 1.60).
